# Supplementary material for: Highly sensitive self-powered ammonia gas detection enabled by a rationally designed PANI/commercial cellulosic paper based triboelectric nanogenerator
Source: Royal Society of Chemistry journal article supplement (doi:10.1039/d3ta04974d), 2023-01-01
Supplement: d3ta04974d1.pdf [file d3ta04974d1.pdf]

## Supporting Information

### **Highly sensitive self-powered ammonia gas detection enabled by rational designed PANI/commercial cellulosic paper based triboelectric nanogenerator**

Maosen Yang<sup>a</sup>, Jinmei Liu<sup>b,\*</sup>, Caixia Hu<sup>c</sup>, Weiqiang Zhang<sup>b</sup>, Jingyi Jiao<sup>b</sup>, Nuanyang Cui<sup>b,\*</sup>, Long Gu<sup>b,\*</sup>

<sup>a</sup> *College of Physics and Electronic Engineering, Heze University, Heze 274015, China*

<sup>b</sup> *School of Advanced Materials and Nanotechnology, Xidian University, Xi'an 710071, China*

<sup>c</sup> *Zouping Science and Technology Bureau, Zouping 256200, China*

## Figures

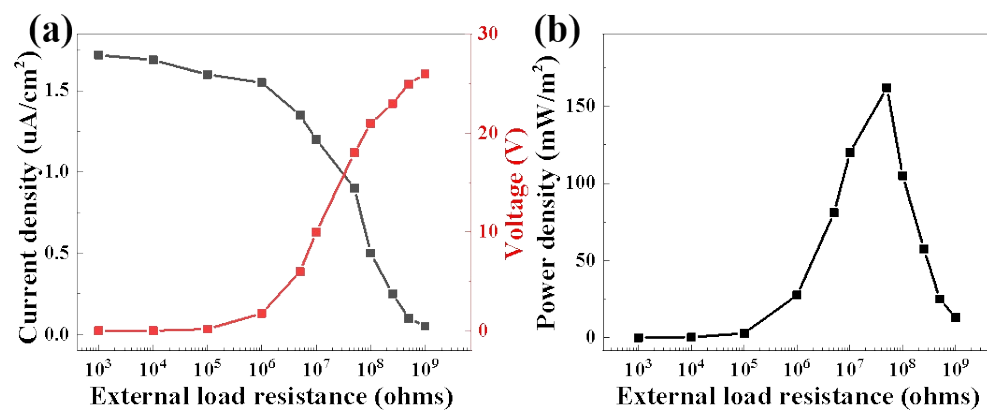

**Fig. S1.** (a) Output voltage and current density of the PC-TENG, (b) The corresponding power density of PC-TENG with different loads.

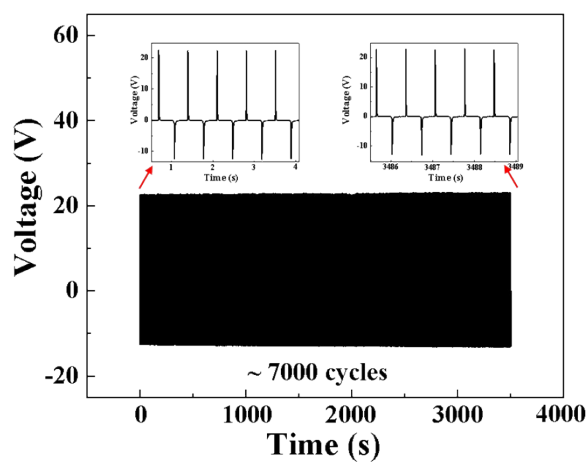

**Fig. S2.** Stability test of the PC-TENG.

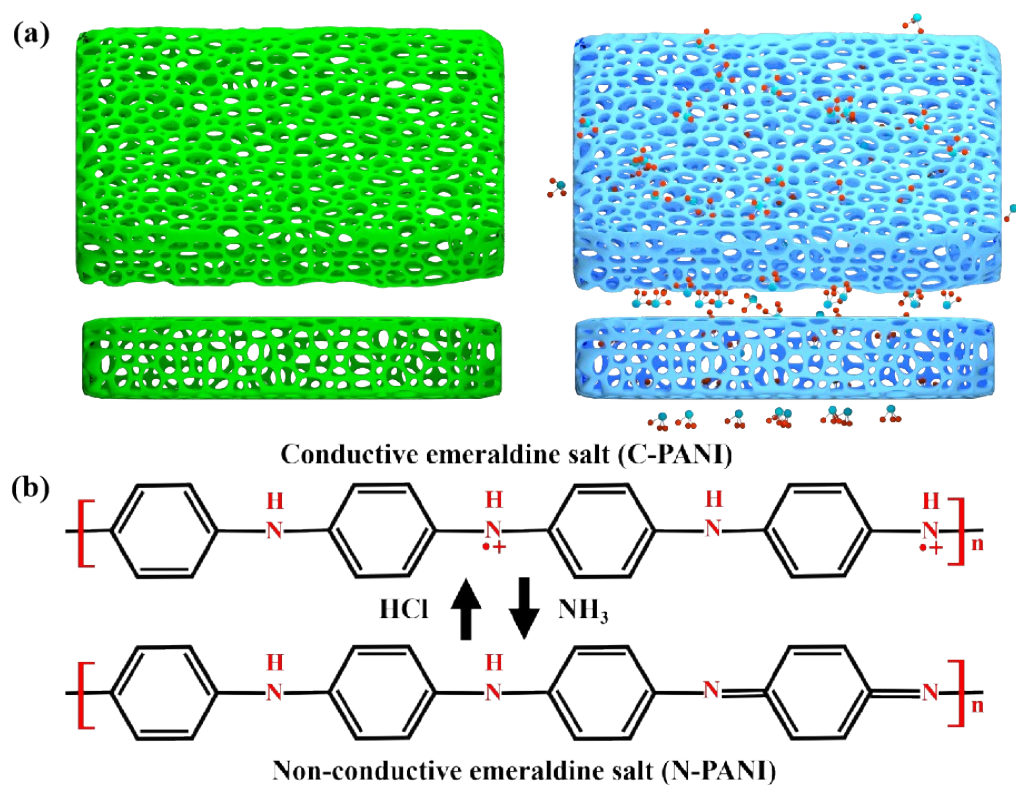

**Fig. S3.** (a) Illustration of NH<sub>3</sub> sensing mechanism in TENG system. (b) Protonation and deprotonation processes of N-PANI and C-PANI in HCl and NH<sub>3</sub> atmospheres.

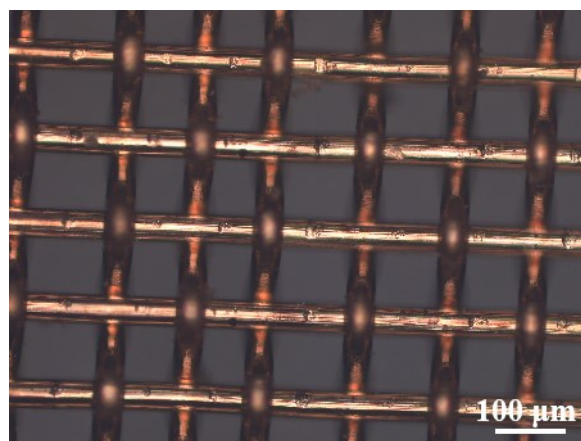

**Fig. S4.** Optical microscope image of the copper mesh.

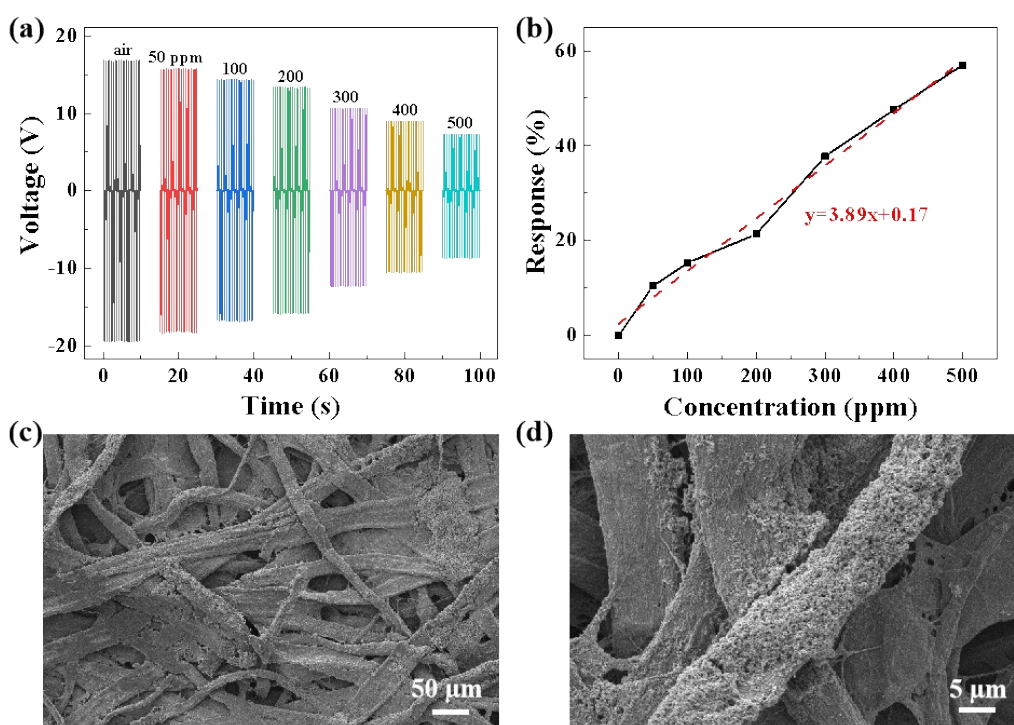

**Fig. S5.** (a) Voltage response changes of A4 paper with different NH<sub>3</sub> concentrations.

(b) SEM images of A4 paper.

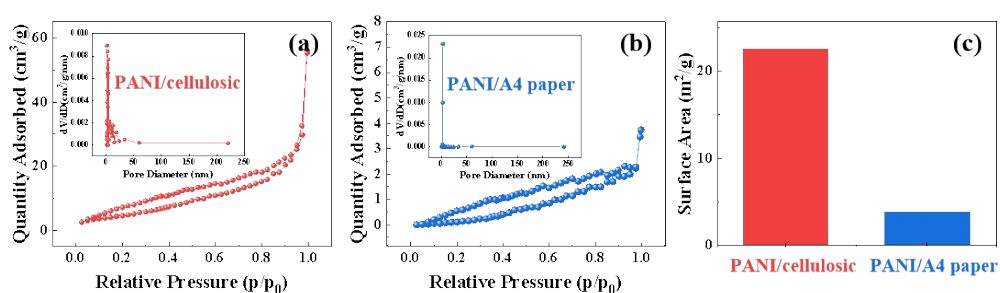

**Fig. S6.** N<sub>2</sub> adsorption/desorption isotherms and pore size distributions of (a) PANI/nitro-cellulosic paper, (b) PANI/A4 paper, respectively. (c) BET surface areas of PANI/nitro-cellulosic paper and PANI/A4 paper.

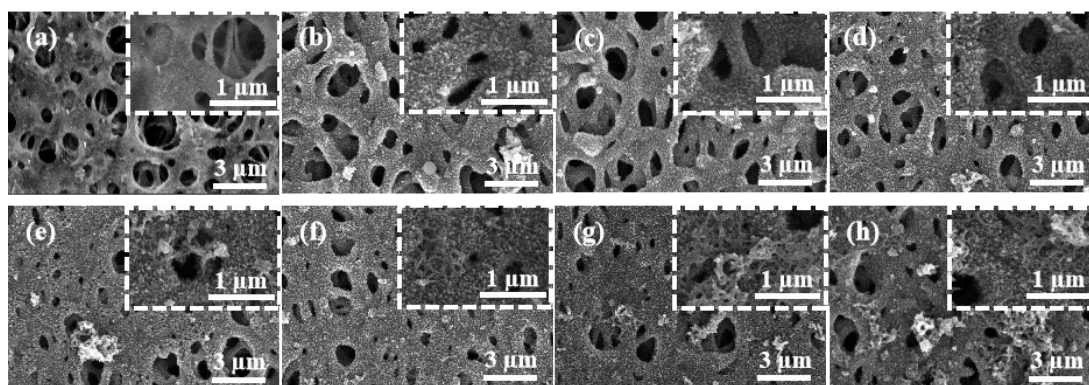

**Fig. S7.** SEM images of PANI/nitro-cellulose with different polymerization times.

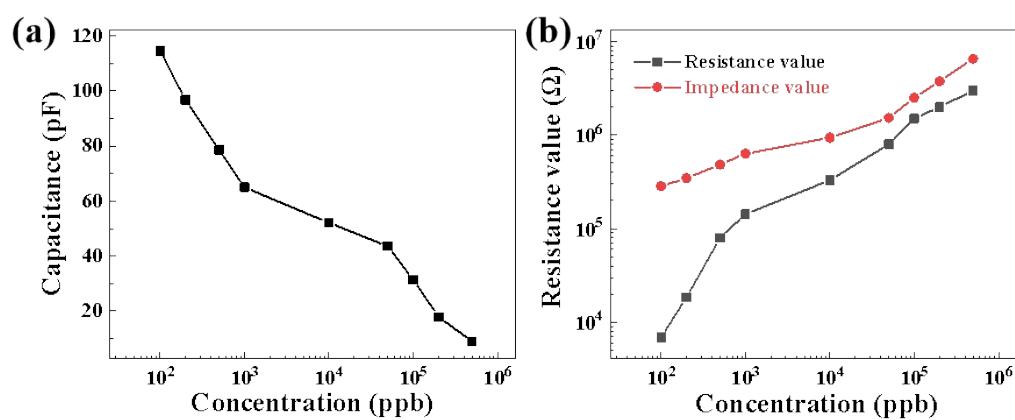

**Fig. S8** (a) Capacitance variation and (b) impedance variation of the PC-TENG when it exposed to  $\text{NH}_3$  with the range of 0.1-500 ppm.

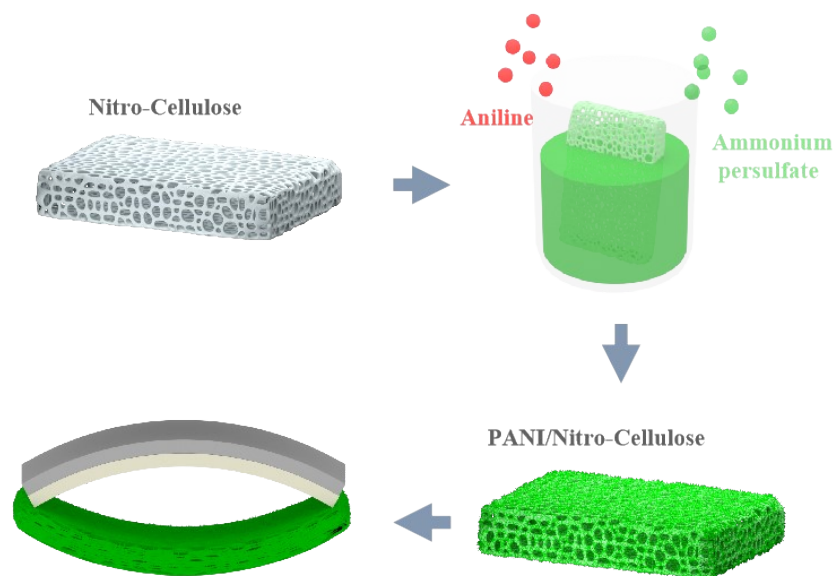

**Fig. S9.** The fabrication process diagram of PC-TENG based on PANI/nitro-cellulose material.

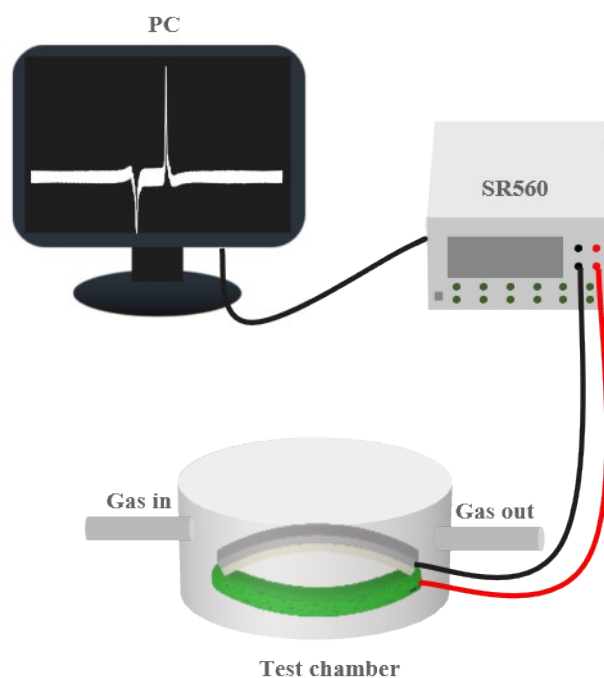

**Fig. S10.** Test flowchart for Self-powered ammonia sensing.

**Table S1**

| <b>Journal</b>                                         | <b>Detection range<br/>(%/ppm)</b>                       | <b>Sensitivity<br/>(%/ppm)</b>              | <b>Response<br/>time (s)</b> | <b>Recovery<br/>times (s)</b> | <b>Sensor/TENG</b> | <b>Ref.</b> |
|--------------------------------------------------------|----------------------------------------------------------|---------------------------------------------|------------------------------|-------------------------------|--------------------|-------------|
| Adv. Sci.2022, 9,<br>2203428                           | 10–120                                                   | 0.47                                        | 12                           | 14                            | Integration        | 1           |
| <i>Nano Energy</i> ,83<br>(2021) 105833                | 50–500                                                   | 14                                          | 9                            | 11                            | Integration        | 2           |
| Nano Energy, 49<br>(2018) 31–39                        | 500–2000                                                 | 0.025                                       | 40                           | 225                           | Integration        | 3           |
| Nano Energy, 58<br>(2019) 312–321                      | 0.1–1<br>1–25                                            | 13.6<br>1.11                                | 109                          | 233                           | Integration        | 4           |
| Adv. Mater.<br>Technol. 2021,<br>2100310               | 0–400                                                    | 0.07366                                     |                              |                               | Integration        | 5           |
| <i>Sci. China Mater.</i><br>2019, 62(10):<br>1433–1444 | 50-250                                                   | 0.18                                        | 13                           | 12                            | Integration        | 6           |
| <i>Nano Energy</i> , 63<br>(2019) 103829               | 0.2–1<br>2–10                                            | 20.13<br>1.13                               | 155                          |                               | Integration        | 7           |
| <b>This work</b>                                       | <b>0.1–1 ppm</b><br><b>1-50 ppm</b><br><b>50-500 ppm</b> | <b>45.41</b><br><b>15.17</b><br><b>5.46</b> | <b>32 s</b>                  | <b>365 s</b>                  | <b>Integration</b> | <b>/</b>    |
